# Supplementary material
Source: publisher site journal article supplement (https://www.dovepress.com/article/537950)
Supplement: Supplementary file 1 [file Supplementary%20file_1.pdf]

### Supplemental Figure 1.

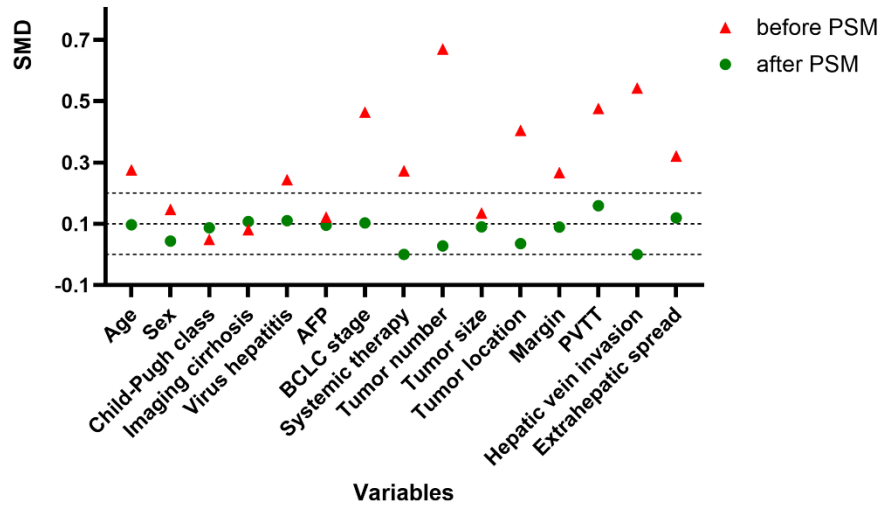

**Figure legends.** Love plot displaying SMDs of baseline variables before and after PSM. Variables are listed on the x-axis. The y-axis represents SMD values. Dashed lines at 0.1 and 0.2 indicate thresholds for acceptable balance. **Abbreviations:** SMD, standardized mean differences; PSM, propensity score matching; AFP, alpha-fetoprotein; BCLC, Barcelona clinical liver cancer staging system; PVTT, portal vein tumor thrombosis.

## Supplemental Figure 2.

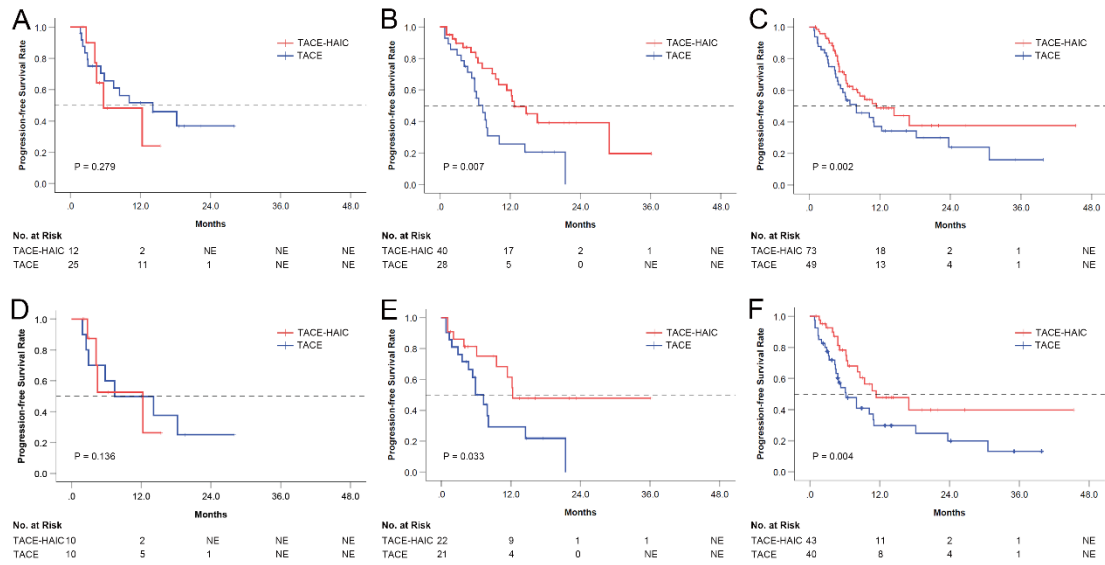

**Figure legends.** Kaplan-Meier curves comparing progression-free survival between the two groups before (A–C) and after PSM (D–F), stratified by systemic treatment regimen. Panels A and D: no systemic therapy; B and E: sintilimab plus bevacizumab; C and F: camrelizumab plus apatinib. **Abbreviations:** TACE, transcatheter arterial chemoembolization; HAIC, hepatic arterial infusion chemotherapy; PSM, propensity score matching. NE, could not be evaluated.

### Supplemental Figure 3

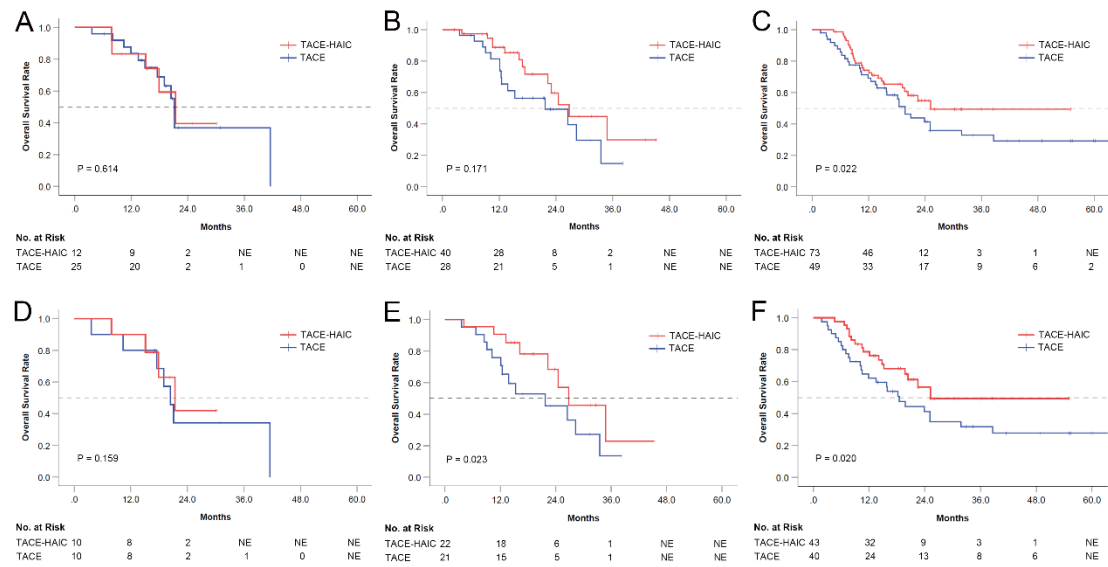

**Figure legends.** Kaplan-Meier curves comparing overall survival between the two groups before (A–C) and after PSM (D–F), stratified by systemic treatment regimen. Panels A and D: no systemic therapy; B and E: sintilimab plus bevacizumab; C and F: camrelizumab plus apatinib. **Abbreviations:** TACE, transcatheter arterial chemoembolization; HAIC, hepatic arterial infusion chemotherapy; PSM, propensity score matching. NE, could not be evaluated.

**Supplemental Table 1** SMD of variables

| Variables             | SMD        |           |
|-----------------------|------------|-----------|
|                       | before PSM | after PSM |
| Age                   | 0.2760     | 0.0970    |
| Sex                   | 0.1471     | 0.0438    |
| Child-Pugh class      | 0.0488     | 0.0871    |
| Imaging cirrhosis     | 0.0805     | 0.1073    |
| Virus hepatitis       | 0.2436     | 0.1103    |
| AFP                   | 0.1215     | 0.0951    |
| BCLC stage            | 0.4646     | 0.1025    |
| Systemic therapy      | 0.2732     | 0.0000    |
| Tumor number          | 0.6706     | 0.0276    |
| Tumor size            | 0.1354     | 0.0904    |
| Tumor location        | 0.4054     | 0.0350    |
| Margin                | 0.2673     | 0.0897    |
| PVTT                  | 0.4765     | 0.1589    |
| Hepatic vein invasion | 0.5434     | 0.0000    |
| Extrahepatic spread   | 0.3213     | 0.1192    |

**Abbreviations:** SMD, standardized mean difference; PSM, propensity score matching; AFP, alpha-fetoprotein; BCLC, Barcelona clinical liver cancer staging system; PVTT, portal vein tumor thrombosis

**Supplementary Table 2** Distribution of AFP changes after PSM

| <b>AFP value</b>            | <b>TACE<br/>(n=77)</b> | <b>TACE-HAIC<br/>(n=77)</b> | <b>P</b> |
|-----------------------------|------------------------|-----------------------------|----------|
| Decreased to normal         | 9 (11.7)               | 15 (19.5)                   | 0.183    |
| Decreased > 50%             | 28 (36.4)              | 32 (41.6)                   | 0.509    |
| Decreased < 50%             | 6 (7.8)                | 7 (9.1)                     | 0.772    |
| Increased < 50%             | 4 (5.2)                | 6 (7.8)                     | 0.513    |
| Increased > 50%             | 16 (20.8)              | 4 (5.2)                     | 0.003    |
| Not elevated (AFP-negative) | 14 (18.2)              | 13 (16.9)                   | 0.832    |

**Notes:** results are expressed as number of patients and (percentages).

**Abbreviations:** AFP, alpha-fetoprotein; PSM, propensity score matching; TACE, transcatheter arterial chemoembolization; HAIC, hepatic arterial infusion chemotherapy

**Supplemental Table 3** Analyses of prognostic factors for progression free survival after PSM

| Variate                   | Univariate            |          | Multivariate         |          |
|---------------------------|-----------------------|----------|----------------------|----------|
|                           | HR (95% CI)           | <i>P</i> | HR (95% CI)          | <i>P</i> |
| Age (years)               | 0.953 (0.934, 0.973)  | 0.001    | 0.950 (0.929, 0.972) | 0.009    |
| Sex (male)                | 0.871 (0.400, 1.895)  | 0.727    |                      |          |
| Child-Pugh class B        | 1.314 (0.824, 2.096)  | 0.252    |                      |          |
| Imaging cirrhosis (Y)     | 0.800 (0.509, 1.258)  | 0.334    |                      |          |
| AFP (ng/ml)               |                       |          |                      |          |
| ≤ 400                     | reference             |          |                      |          |
| > 400                     | 1.362 (0.854, 2.172)  | 0.195    |                      |          |
| Group                     |                       |          |                      |          |
| TACE                      | reference             |          | reference            |          |
| TACE-HAIC                 | 0.503 (0.323, 0.800)  | 0.003    | 0.407 (0.256, 0.648) | < 0.001  |
| BCLC stage                |                       | 0.016    |                      | 0.023    |
| A                         | reference             |          | reference            |          |
| B                         | 3.283 (1.103, 9.773)  | 0.033    | 1.812 (0.587, 5.593) | 0.301    |
| C                         | 4.282 (1.552, 11.810) | 0.005    | 3.141 (1.108, 8.905) | 0.031    |
| Tumor number ≥ 10         | 1.845 (1.120, 3.038)  | 0.016    | 1.342 (0.715, 2.518) | 0.360    |
| Margin                    |                       |          |                      |          |
| continuous capsule        | reference             |          | reference            |          |
| non-continuous capsule    | 2.912 (1.265, 6.704)  | 0.012    | 1.948 (0.828, 4.582) | 0.127    |
| Tumor location            |                       |          | 0.279                |          |
| one lobe                  | reference             |          |                      |          |
| left/right lobe           | 1.399 (0.736, 2.656)  | 0.305    |                      |          |
| multiple liver lobes      | 1.680 (0.885, 3.187)  | 0.112    |                      |          |
| PVTT                      |                       | 0.406    |                      |          |
| none                      | reference             |          |                      |          |
| vp1-2                     | 1.676 (0.893, 3.145)  | 0.108    |                      |          |
| vp3                       | 1.094 (0.624, 1.919)  | 0.753    |                      |          |
| vp4                       | 0.974 (0.523, 1.814)  | 0.934    |                      |          |
| Hepatic vein invasion (Y) | 2.750 (1.422, 5.319)  | 0.003    | 2.694 (1.368, 5.306) | 0.004    |
| Extrahepatic spread (Y)   | 1.986 (1.244, 3.172)  | 0.004    | 1.722 (1.068, 2.777) | 0.026    |

**Notes:** HRs and 95% CI and corresponding *P* values were calculated by Cox regression analysis.

**Abbreviations:** PSM, propensity score matching; AFP, alpha-fetoprotein; TACE, transarterial chemoembolization; HAIC, hepatic arterial infusion chemotherapy; BCLC, Barcelona clinical liver cancer staging system; Vp classification: The Liver Cancer Study Group of Japan ranks portal vein tumor thrombosis (PVTT) into five types, from Vp0 to Vp4.

**Supplemental Table 4** Analyses of prognostic factors for overall survival after PSM

| Variate                   | Univariate           |          | Multivariate         |          |
|---------------------------|----------------------|----------|----------------------|----------|
|                           | HR (95% CI)          | <i>P</i> | HR (95% CI)          | <i>P</i> |
| Age (years)               | 1.597 (0.645, 3.955) | 0.311    |                      |          |
| Sex (male)                | 0.982 (0.964, 1.000) | 0.055    |                      |          |
| Child-Pugh class B        | 1.932 (1.228, 3.040) | 0.004    | 1.863 (1.176, 2.953) | 0.008    |
| Imaging cirrhosis (Y)     | 0.897 (0.569, 1.415) | 0.641    |                      |          |
| AFP (ng/ml)               |                      |          |                      |          |
| ≤ 400                     | reference            |          |                      |          |
| > 400                     | 1.386 (0.821, 2.343) | 0.222    |                      |          |
| Group                     |                      |          |                      |          |
| TACE                      | reference            |          | reference            |          |
| TACE-HAIC                 | 0.562 (0.391, 0.889) | 0.043    | 0.519 (0.325, 0.829) | 0.006    |
| BCLC stage                |                      |          |                      |          |
| A                         | reference            |          | reference            |          |
| B                         | 1.188 (0.444, 3.175) | 0.731    | 0.512 (0.168, 1.567) | 0.241    |
| C                         | 2.028 (0.875, 4.699) | 0.099    | 0.643 (0.223, 1.855) | 0.414    |
| Tumor number ≥10          | 1.993 (1.177, 3.375) | 0.010    |                      |          |
| Margin                    |                      |          |                      |          |
| continuous capsule        | reference            |          | reference            |          |
| non-continuous capsule    | 2.101 (1.006, 4.388) | 0.048    | 1.841 (1.281, 2.645) | 0.001    |
| Tumor location            |                      |          |                      |          |
| one lobe                  | reference            |          |                      |          |
| left/right lobe           | 1.206 (0.646, 2.250) | 0.556    |                      |          |
| multiple liver lobes      | 1.540 (0.818, 2.898) | 0.181    |                      |          |
| PVTT                      |                      |          |                      |          |
| none                      | reference            |          |                      |          |
| vp1-2                     | 1.370 (0.709, 2.650) | 0.349    |                      |          |
| vp3                       | 1.146 (0.652, 2.013) | 0.636    |                      |          |
| vp4                       | 0.932 (0.499, 1.742) | 0.826    |                      |          |
| Hepatic vein invasion (Y) | 0.623 (0.252, 1.541) | 0.305    |                      |          |
| Extrahepatic spread (Y)   | 1.951 (1.240, 3.070) | 0.004    | 1.616 (0.971, 2.688) | 0.065    |

**Notes:** HRs and 95% CI and corresponding *P* values were calculated by Cox regression analysis.

**Abbreviations:** PSM, propensity score matching; AFP, alpha-fetoprotein; TACE, transarterial chemoembolization; HAIC, hepatic arterial infusion chemotherapy; BCLC, Barcelona clinical liver cancer staging system; Vp classification: The Liver Cancer Study Group of Japan ranks portal vein tumor thrombosis (PVTT) into five types, from Vp0 to Vp4.

**Supplementary Table 5** Systemic therapies of patients

| Variable                       | before matching |                      |          | after matching |                     |          |
|--------------------------------|-----------------|----------------------|----------|----------------|---------------------|----------|
|                                | TACE<br>(n=110) | TACE-HAIC<br>(n=132) | <i>P</i> | TACE<br>(n=77) | TACE-HAIC<br>(n=77) | <i>P</i> |
| Systemic therapies (%)         |                 |                      | 0.048    |                |                     | 0.592    |
| None                           | 25 (22.7)       | 12 (9.1)             |          | 10 (13.0)      | 10 (13.0)           |          |
| Sorafenib                      | 2 (1.8)         | 2 (1.8)              |          | 2 (2.6)        | 0 (0)               |          |
| Lenvatinib                     | 6 (5.5)         | 5 (3.8)              |          | 4 (5.2)        | 2 (2.6)             |          |
| Sintilimab plus<br>bevacizumab | 28 (25.5)       | 40 (30.3)            |          | 21 (27.3)      | 22 (28.6)           |          |
| Camrelizumab plus<br>apatinib  | 49 (44.5)       | 73 (55.3)            |          | 40 (51.9)      | 43 (55.8)           |          |

**Abbreviations:** TACE, transarterial chemoembolization; HAIC, hepatic arterial infusion chemotherapy.

**Supplemental Table 6** Related adverse events in the matched cohorts

| Adverse events          | Any grade           |                |          | Grade 3-4           |                |          |
|-------------------------|---------------------|----------------|----------|---------------------|----------------|----------|
|                         | TACE-HAIC<br>(n=77) | TACE<br>(n=77) | <i>P</i> | TACE-HAIC<br>(n=77) | TACE<br>(n=77) | <i>P</i> |
| Fever                   | 40 (51.9)           | 43 (49.4)      | 0.747    | 1 (1.3)             | 2 (2.6)        | 1.000    |
| Nausea/vomiting         | 35 (45.5)           | 20 (26.0)      | 0.012    | 5 (6.5)             | 4 (5.2)        | 1.000    |
| Abdominal pain          | 21 (27.3)           | 33 (42.9)      | 0.043    | 9 (11.7)            | 12 (15.6)      | 0.481    |
| Diarrhea                | 7 (9.1)             | 5 (6.5)        | 0.548    | 2 (2.6)             | 1 (1.3)        | 1.000    |
| Transaminase            |                     |                |          |                     |                |          |
| ALT elevation           | 50 (64.9)           | 57 (74.0)      | 0.221    | 13 (16.9)           | 15 (19.5)      | 0.676    |
| AST elevation           | 58 (75.3)           | 63 (81.8)      | 0.326    | 14 (18.2)           | 16 (20.8)      | 0.684    |
| Leukopenia              | 16 (20.8)           | 15 (19.5)      | 0.841    | 5 (6.5)             | 2 (2.6)        | 0.442    |
| Thrombocytopenia        | 27 (35.1)           | 15 (19.5)      | 0.030    | 5 (6.5)             | 1 (1.3)        | 0.209    |
| Hand-foot skin reaction | 14 (18.2)           | 12 (15.6)      | 0.667    | 4 (5.2)             | 2 (2.6)        | 0.681    |
| Hypertension            | 12 (15.6)           | 9 (11.7)       | 0.481    | 2 (2.6)             | 1 (1.3)        | 1.000    |
| Proteinuria             | 4 (5.2)             | 4 (5.2)        | 1.000    | 1 (1.3)             | 2 (2.6)        | 1.000    |
| Hypothyroidism          | 7 (9.1)             | 5 (6.5)        | 0.548    | 1 (1.3)             | 1 (1.3)        | 1.000    |
| Immune hepatitis        | 2 (2.6)             | 1 (1.3)        | 1.000    | 1 (1.3)             | 0 (0.0)        | —        |
| Liver abscess           | 0 (0.0)             | 3 (3.9)        | 0.245    | 0 (0.0)             | 3 (3.9)        | 0.245    |
| Groin hematoma          | 2 (2.6)             | 3 (3.9)        | 1.000    | 0 (0.0)             | 0 (0.0)        | —        |

**Notes:** values are presented as n (%).

**Abbreviations:** TACE, transarterial chemoembolization; HAIC, hepatic arterial infusion chemotherapy; AST, aspartate transaminase; ALT, alanine transaminase.
